# Supplementary material
Source: publisher figshare collection journal article supplement (https://gsajournals.figshare.com/ndownloader/files/12802724)
Supplement: Supplementary file 1 [file 12802724]

**Table S1 Overview of the predicted results of the *M. vittatus* genome.**

| Description | Value |
| --- | --- |
| Genome size(bp) | 683,827 |
| Gene number | 1,041 |
| Protein-coding genes (excluding pseudogenes) | 1,010 |
| Gene length (bp) | 607,417 |
| GC content (%) | 42.70 |
| GC content in gene region (%) | 43.28 |
| Gene/Genome (%) | 88.83 |
| Gene average length (bp) | 583 |
| Intergenic region length (bp) | 76,410 |
| Intergenic length/Genome (%) | 11.17 |
| Pseudogenes | 0 |
| tRNA number | 29 |
| tRNA average length (bp) | 78 |
| rRNA (by de novo prediction) | 2 |
